# Supplementary material
Source: PubMed Central journal article supplement (PMC3429650)
Supplement: NIHMS381511-supplement-01.pdf [file NIHMS381511-supplement-01.pdf]

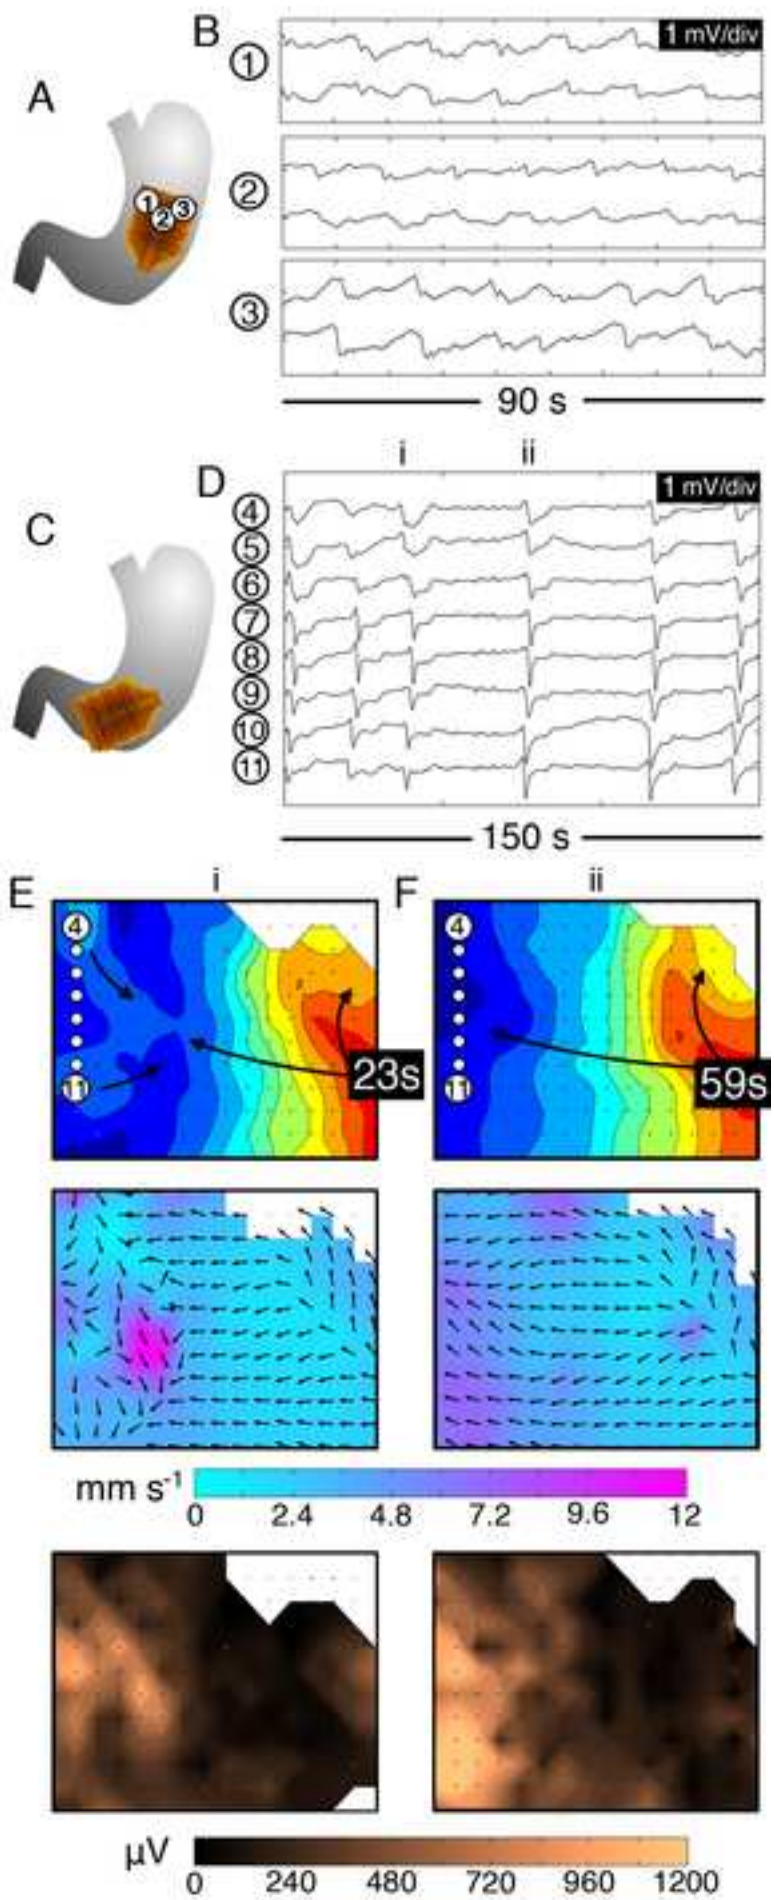

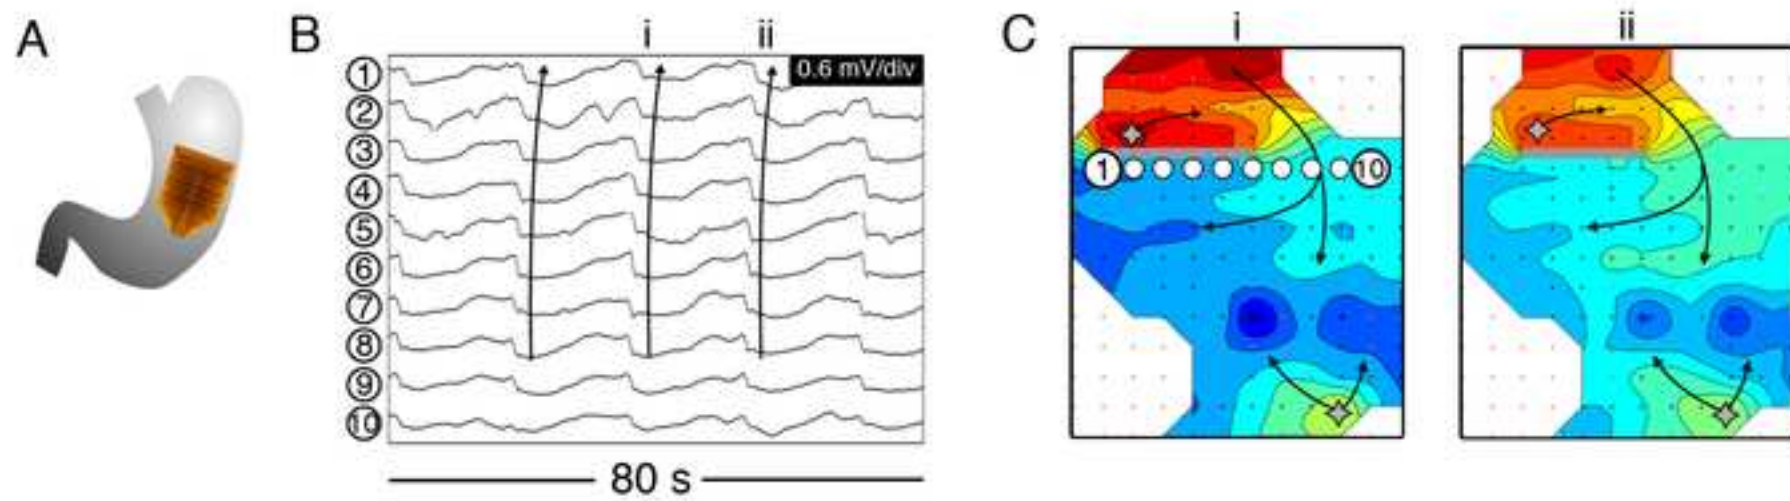

### Supplementary Figure 1

Abnormal slow-wave initiation: mismatched frequencies in adjacent gastric regions (non-continuous recording); example from diabetic gastroparesis (ID#6). **A.** Position diagram relating to (B). **B.** A persistent disorganized pattern of aberrant initiation was recorded at the mid corpus ( $4.5 \pm 0.3$  SD c/min). Representative electrograms are shown from the three distinct regions indicated in (A). The gross spatial disorganization precluded activation mapping; however, data animation demonstrated scattered focal activities, multiple propagating waves, and colliding wavefronts (*SuppFigure1i.wmv*). **C.** Position diagram relating to (E-F); the **recording** array was then relocated distally in the same patient. **D.** Example electrograms from eight electrodes positioned as indicated in (E), demonstrating lower frequency activity ( $2.3 \pm 0.1$  SD c/min;  $P < 0.0001$  vs corpus). **E.** Isochronal maps for representative waves (*i*) and (*ii*); intervals = 2 s. The distal activity was spatially dissociated from the disorganized proximal activity. Irregular focal activities occurred periodically in the distal field, colliding with the proximal wavefronts (*i*). At other times, the proximal activity successfully entrained the whole field (*ii*). The time stamps are referenced to the accompanying animation (*SuppFigure1ii.wmv*).

### Supplementary Figure 2

Abnormal slow-wave conduction in a patient with idiopathic gastroparesis (ID#10) and severe ICC depletion ( $0.3 \pm 0.6$  SD bodies / field). **A.** Position diagram. **B.** Electrograms (from the positions indicated in C) demonstrate regular activity of normal frequency ( $3.4 \pm 0.2$  SD c/min). **C.** A consistently stable but highly deranged propagation pattern was observed for the recorded duration (maps *i-ii*, see also animation *SuppFigure2.wmv*), including conduction block (grey bar), circumferential propagation distal to the block, and retrograde propagation with colliding wavefronts.

### Supplementary Table 1

Comparison of patient and experimental variables between the present study and a previous study of human subjects with normal stomachs, who were mapped and analyzed using similar methods <sup>16</sup>, and in whom no abnormal slow-wave events were observed intra-operatively.

\* ([www.smoothmap.org](http://www.smoothmap.org)).

### Supplementary Table 2

Individual patient data from the study cohort. *n.d.: no data.*

Supplementary Table 1

|                                                   | <b>Cohort with Normal Stomachs</b> <sup>16</sup>                                                                                                                                                       | <b>Gastroparesis Cohort (current study)</b>                                                                                                                      |
|---------------------------------------------------|--------------------------------------------------------------------------------------------------------------------------------------------------------------------------------------------------------|------------------------------------------------------------------------------------------------------------------------------------------------------------------|
| <i>No. Patients</i>                               | 12                                                                                                                                                                                                     | 12                                                                                                                                                               |
| <i>Age (median, range)</i>                        | 50 yrs (21-60)                                                                                                                                                                                         | 42 yrs (30-60)                                                                                                                                                   |
| <i>Sex (M:F)</i>                                  | 7:5                                                                                                                                                                                                    | 6:6                                                                                                                                                              |
| <i>Time of Mapping</i>                            | Immediately following incision                                                                                                                                                                         | Immediately following incision                                                                                                                                   |
| <i>Duration of Mapping (mean ± SD)</i>            | 11.5 ± 3.9 min / pt                                                                                                                                                                                    | 13.4 ± 4.6 min / pt                                                                                                                                              |
| <i>Anaesthetic Regimen</i>                        | Prophylactic antibiotics, benzodiazepine premedication, an epidural anesthetic, a short-acting intravenous opiate, muscle relaxant (atracurium or suxamethonium), propofol, isoflurane or sevoflurane. | Prophylactic antibiotics, benzodiazepine premedication, a short-acting intravenous opiate, muscle relaxants (suxamethonium or rocuronium), propofol, desflurane. |
| <i>Off-line Filtering Methods</i>                 | 2 Hz low-pass Butterworth filter                                                                                                                                                                       | Savitzky-Golay and moving median filters <sup>19</sup>                                                                                                           |
| <i>Analysis and Isochronal Mapping Methods</i>    | Manual analyses in SmoothMap v3.05*                                                                                                                                                                    | FEVT, REGROUPS, and SIV methods (performed in GEMS v1.2 <sup>18,20,21</sup> with manual review)                                                                  |
| <i>Velocity and Amplitude Calculation Methods</i> | Algorithms in SmoothMap v3.05*                                                                                                                                                                         | Algorithms in GEMS v1.2 <sup>18,19,23</sup>                                                                                                                      |

Supplementary Table 2

| <b>ID</b>      | <b>Aetiology</b> | <b>Sex</b> | <b>Age</b> | <b>BMI</b> | <b>TSS</b> | <b>GET (4-hr Retention)</b> | <b>ICC Count (mean, SD)</b> | <b>Figures / Animations</b>                    |
|----------------|------------------|------------|------------|------------|------------|-----------------------------|-----------------------------|------------------------------------------------|
| 1              | Diabetic         | M          | 32         | 28         | 13         | 27%                         | n.d.                        | <i>Figure 5;</i><br><i>Figure5i-ii.wmv</i>     |
| 2              | Diabetic         | M          | 39         | 27         | n/a        | 41%                         | n.d.                        | <i>Figure 6;</i><br><i>Figure6i.wmv</i>        |
| 3              | Diabetic         | M          | 32         | 21         | 14.5       | 22%                         | 1.7 ± 1.5                   | <i>Figure 1</i><br><i>Figure1.wmv</i>          |
| 4              | Diabetic         | M          | 30         | 21         | 17.5       | 74%                         | 2.1 ± 1.3                   | <i>Figure 6;</i><br><i>Figure6ii.wmv</i>       |
| 5              | Diabetic         | F          | 50         | 32         | 18         | 27%                         | 3.3 ± 2.0                   | <i>Figure 4;</i><br><i>Figure4i-iii.wmv</i>    |
| 6              | Diabetic         | M          | 42         | n.d.       | 14         | 47%                         | 2.5 ± 1.8                   | <i>Supp. Fig 1;</i><br><i>SuppFig4i-ii.wmv</i> |
| 7              | Diabetic         | F          | 38         | n.d.       | 17.5       | 14%                         | 3.9 ± 2.5                   | -                                              |
| 8              | Diabetic         | M          | 62         | 44         | 20         | 25%                         | 2.0 ± 1.6                   | -                                              |
| 9              | Idiopathic       | F          | 58         | 16         | 14         | 19%                         | n.d.                        | <i>Figure 5</i>                                |
| 10             | Idiopathic       | F          | 62         | 23         | 16         | 75%                         | 0.3 ± 0.6                   | <i>Supp. Fig 2;</i><br><i>SuppFig2.wmv</i>     |
| 11             | Idiopathic       | F          | 34         | 30         | 20         | 15%                         | 2.5 ± 2.1                   | -                                              |
| 12             | Idiopathic       | F          | 58         | 27         | 15.5       | 19%                         | 2.2 ± 1.7                   | -                                              |
| <b>Median:</b> | -                | -          | <b>42</b>  | <b>27</b>  | <b>16</b>  | <b>26%</b>                  | <b>2.2</b>                  | -                                              |

### Supplementary Figure 1

Abnormal slow-wave initiation: mismatched frequencies in adjacent gastric regions (non-continuous recording); example from diabetic gastroparesis (ID#6). **A.** Position diagram relating to (B). **B.** A persistent disorganized pattern of aberrant initiation was recorded at the mid corpus ( $4.5 \pm 0.3$  SD c/min). Representative electrograms are shown from the three distinct regions indicated in (A). The gross spatial disorganization precluded activation mapping; however, data animation demonstrated scattered focal activities, multiple propagating waves, and colliding wavefronts (*SuppFigure1i.wmv*). **C.** Position diagram relating to (E-F); the recording array was then relocated distally in the same patient. **D.** Example electrograms from eight electrodes positioned as indicated in (E), demonstrating lower frequency activity ( $2.3 \pm 0.1$  SD c/min;  $P < 0.0001$  vs corpus). **E.** Isochronal maps for representative waves (*i*) and (*ii*); intervals = 2 s. The distal activity was spatially dissociated from the disorganized proximal activity. Irregular focal activities occurred periodically in the distal field, colliding with the proximal wavefronts (*i*). At other times, the proximal activity successfully entrained the whole field (*ii*). The time stamps are referenced to the accompanying animation (*SuppFigure1ii.wmv*).

### Supplementary Figure 2

Abnormal slow-wave conduction in a patient with idiopathic gastroparesis (ID#10) and severe ICC depletion ( $0.3 \pm 0.6$  SD bodies / field). **A.** Position diagram. **B.** Electrograms (from the positions indicated in C) demonstrate regular activity of normal frequency ( $3.4 \pm 0.2$  SD c/min). **C.** A consistently stable but highly deranged propagation pattern was observed for the recorded duration (maps *i-ii*, see also animation *SuppFigure2.wmv*), including conduction block (grey bar), circumferential propagation distal to the block, and retrograde propagation with colliding wavefronts.

### Supplementary Table 1

Comparison of patient and experimental variables between the present study and a previous study of human subjects with normal stomachs, who were mapped and analyzed using similar methods <sup>16</sup>, and in whom no abnormal slow-wave events were observed intra-operatively.

\* ([www.smoothmap.org](http://www.smoothmap.org)).

### Supplementary Table 2

Individual patient data from the study cohort. *n.d.: no data.*
